# Supplementary material for: Comparison of oral metabolome profiles of stimulated saliva, unstimulated saliva, and mouth-rinsed water
Source: PubMed Central journal article supplement (PMC8758762; doi:10.1038/s41598-021-04612-x), 2022-01-13
Supplement: 41598_2021_4612_MOESM1_ESM.pdf [file 41598_2021_4612_MOESM1_ESM.pdf]

Comparison of oral metabolome profiles of stimulated saliva, unstimulated saliva, and mouth-rinsed water

Yuki Maruyama<sup>1</sup>, Yuichiro Nishimoto<sup>2</sup>, Kouta Umezawa<sup>3</sup>, Ryosuke Kawamata<sup>1</sup>, Yuko Ichiba<sup>1</sup>, Kota Tsutsumi<sup>1</sup>, Mitsuo Kimura<sup>1</sup>, Shinnosuke Murakami<sup>2,4</sup>, Yasushi Kakizawa<sup>1</sup>, Takashi Kumagai<sup>3</sup>, Takuji Yamada<sup>2,5</sup> & Shinji Fukuda<sup>2,4,6,7\*</sup>

<sup>1</sup> Research and Development Headquarters, Lion Corporation, 7-2-1 Hirai, Edogawa-ku, Tokyo, 132-0035, Japan.

<sup>2</sup> Metabologenomics, Inc., 246-2 Mizukami, Kakuganji, Tsuruoka, Yamagata, 997-0052, Japan.

<sup>3</sup> Hiyoshi Oral Health Clinics, 2-1-16 Hiyoshi-cho, Sakata, Yamagata, 998-0037, Japan.

<sup>4</sup> Institute for Advanced Biosciences, Keio University, 246-2 Mizukami, Kakuganji, Tsuruoka, Yamagata, 997-0052, Japan.

<sup>5</sup> Department of Life Science and Technology, Tokyo Institute of Technology, 2-12-1 Ookayama, Meguro, Tokyo, 152-8550, Japan.

<sup>6</sup> Intestinal Microbiota Project, Kanagawa Institute of Industrial Science and Technology, 3-25-13 Tonomachi, Kawasaki-ku, Kawasaki, Kanagawa, 210-0821, Japan.

<sup>7</sup> Transborder Medical Research Center, University of Tsukuba, 1-1-1 Tennodai, Tsukuba, Ibaraki, 305-8575, Japan.

\*Correspondence:

Shinji Fukuda

Metabologenomics, Inc., 246-2 Mizukami, Kakuganji, Tsuruoka, Yamagata, 997-0052, Japan

Email: [sfukuda@metagen.co.jp](mailto:sfukuda@metagen.co.jp)

Tel: (81+)235-64-0330

**Supplementary Table S1.** The 108 oral metabolites commonly detected between the three sampling methods with no significant differences in each cluster.

| KEGG ID | Compound Name                      | average±SE      |                 |                 | p-value* |          |          |
|---------|------------------------------------|-----------------|-----------------|-----------------|----------|----------|----------|
|         |                                    | US <sup>a</sup> | MW <sup>b</sup> | SS <sup>c</sup> | US vs MW | US vs SS | MW vs SS |
| C11118  | 1-Methyl-2-pyrrolidinone           | 1.3±0.26        | 1.1±0.21        | 0.91±0.20       | 0.99     | 0.36     | 0.40     |
| C05127  | 1-Methylhistamine                  | 0.0017±0.000071 | 0.0033±0.0      | 0.0037±0.0002   | 0.88     | 0.97     | 0.82     |
| C02356  | 2-Aminobutyrate                    | 0.040±0.018     | 0.039±0.0063    | 0.03±0.0065     | 0.32     | 0.95     | 0.59     |
| C00881  | 2'-Deoxycytidine                   | 0.0024±0.00046  | 0.0±0.0         | 0.0067±0.00086  | 0.31     | 0.71     | 0.16     |
| C00330  | 2'-Deoxyguanosine                  | 0.0055±0.000067 | 0.0±0.0         | 0.018±0.0032    | 0.31     | 0.39     | 0.078    |
| C03264  | 2-Hydroxy-4-methylpentanoate       | 0.16±0.056      | 0.10±0.014      | 0.097±0.015     | 0.97     | 0.87     | 0.56     |
| –       | 2-Hydroxypentanoate                | 0.071±0.019     | 0.097±0.016     | 0.071±0.011     | 0.25     | 0.73     | 0.36     |
| C02504  | 2-Isopropylmalate                  | 0.011±0.0023    | 0.027±0.0036    | 0.021±0.0040    | 0.050    | 0.086    | 0.68     |
| C00109  | 2-Oxobutyrate                      | 0.053±0.014     | 0.067±0.01      | 0.092±0.034     | 0.52     | 0.32     | 0.15     |
| C00141  | 2-Oxoisopentanoate                 | 0.029±0.0049    | 0.041±0.0023    | 0.039±0.0042    | 0.73     | 0.086    | 0.68     |
| C01744  | 3-(4-Hydroxyphenyl)propionate      | 0.35±0.078      | 0.43±0.048      | 0.32±0.057      | 0.98     | 0.58     | 0.53     |
| C05145  | 3-Aminoisobutyrate                 | 0.018±0.0025    | 0.030±0.0055    | 0.019±0.0016    | 0.77     | 0.89     | 0.77     |
| C03761  | 3-Hydroxy-3-methylglutarate        | 0.0078±0.00055  | 0.010±0.0       | 0.0098±0.00089  | 0.40     | 0.74     | 0.82     |
| C01089  | 3-Hydroxybutyrate                  | 0.13±0.017      | 0.24±0.033      | 0.30±0.11       | 0.12     | 0.29     | 1.0      |
| C01152  | 3-Methylhistidine                  | 0.0055±0.00046  | 0.0088±0.00057  | 0.0073±0.00095  | 0.63     | 0.73     | 0.92     |
| C05607  | 3-Phenyllactate                    | 0.056±0.010     | 0.086±0.011     | 0.095±0.016     | 0.14     | 0.77     | 0.92     |
| C05629  | 3-Phenylpropionate                 | 0.56±0.11       | 0.51±0.090      | 0.37±0.067      | 0.97     | 0.40     | 0.36     |
| C05135  | 4-(beta-Acetylaminoethyl)imidazole | 0.0032±0.00047  | 0.0069±0.000089 | 0.0035±0.00038  | 0.98     | 0.92     | 0.97     |
| C11527  | 4-Hydroxymandelate                 | 0.22±0.065      | 0.19±0.04       | 0.18±0.061      | 0.97     | 0.82     | 0.84     |
| C00233  | 4-Methyl-2-oxopentanoate           | 0.050±0.010     | 0.071±0.0075    | 0.084±0.012     | 0.12     | 0.05     | 0.77     |
| C00430  | 5-Aminolevulinate                  | 0.0032±0.00022  | 0.0±0.0         | 0.0042±0.0      | 0.31     | 0.88     | 0.58     |
| C00431  | 5-Aminovalerate                    | 9.4±1.6         | 8.8±1.4         | 7.5±1.4         | 1.0      | 0.82     | 0.82     |
| C05198  | 5'-Deoxyadenosine                  | 0.0024±0.000029 | 0.0±0.0         | 0.0041±0.00075  | 0.31     | 0.82     | 0.16     |
| C02242  | 7-Methylguanine                    | 0.0039±0.00025  | 0.0060±0.00034  | 0.0064±0.00059  | 0.46     | 0.80     | 0.33     |
| C00212  | Adenosine                          | 0.0048±0.00093  | 0.0091±0.0015   | 0.0072±0.0012   | 0.36     | 0.22     | 0.95     |
| C04677  | AICAR <sup>fd</sup>                | 0.032±0.0015    | 0.066±0.0030    | 0.036±0.002     | 0.83     | 0.96     | 0.57     |
| C00041  | Alanine                            | 0.62±0.23       | 0.62±0.079      | 1.1±0.23        | 0.49     | 0.25     | 0.49     |
| C00993  | Alanyl-alanine                     | 0.021±0.0059    | 0.029±0.0033    | 0.044±0.0090    | 0.22     | 0.086    | 0.54     |
| C00152  | Asparagine                         | 0.031±0.00074   | 0.0±0.0         | 0.00074±0.0     | 0.31     | 0.75     | 0.58     |
| C08261  | Azelate                            | 0.0063±0.0010   | 0.024±0.0024    | 0.0093±0.0017   | 0.19     | 0.97     | 0.20     |
| C09815  | Benzamide                          | 0.39±0.066      | 0.49±0.055      | 0.34±0.041      | 0.77     | 0.77     | 0.27     |
| C00099  | beta-Alanine                       | 0.037±0.0034    | 0.050±0.004     | 0.039±0.0067    | 0.086    | 0.86     | 0.19     |
| C00719  | Betaine                            | 0.096±0.0091    | 0.14±0.016      | 0.19±0.037      | 0.060    | 0.050    | 0.54     |
| C00120  | Biotin                             | 0.025±0.0030    | 0.040±0.0       | 0.027±0.0       | 0.40     | 0.30     | 1.0      |
| C01672  | Cadaverine                         | 0.28±0.085      | 0.30±0.088      | 0.28±0.078      | 0.92     | 0.97     | 0.92     |
| C00386  | Carnosine                          | 0.0048±0.0      | 0.0±0.0         | 0.0064±0.00069  | 0.58     | 0.43     | 0.16     |
| C00417  | cis-Aconitate                      | 0.014±0.0035    | 0.025±0.0031    | 0.024±0.0042    | 0.19     | 0.36     | 0.89     |
| C00158  | Citrate                            | 0.43±0.11       | 0.18±0.041      | 0.63±0.17       | 0.16     | 0.82     | 0.4      |
| C00055  | Cytidine-5'-monophosphate          | 0.0±0.0         | 0.026±0.0       | 0.0093±0.0011   | 0.58     | 0.31     | 0.88     |
| C00791  | Creatinine                         | 0.12±0.011      | 0.13±0.011      | 0.16±0.012      | 0.92     | 0.32     | 0.36     |
| C00506  | Cysteate                           | 0.015±0.0017    | 0.032±0.00069   | 0.022±0.0023    | 1.0      | 0.31     | 0.87     |
| C00606  | Cysteine sulfinate                 | 0.041±0.0040    | 0.083±0.0047    | 0.073±0.0059    | 0.91     | 0.97     | 0.96     |
| C00491  | Cystine                            | 0.0064±0.00062  | 0.0±0.0         | 0.0094±0.0015   | 0.078    | 0.96     | 0.078    |
| C00475  | Cytidine                           | 0.013±0.0024    | 0.020±0.0034    | 0.014±0.0017    | 0.086    | 0.59     | 0.40     |
| C00092  | Glucose 6-phosphate                | 0.061±0.019     | 0.092±0.0099    | 0.14±0.029      | 0.29     | 0.14     | 0.77     |
| C00334  | gamma-Aminobutyrate                | 0.031±0.0043    | 0.042±0.0050    | 0.040±0.0082    | 0.29     | 0.92     | 0.86     |
| C01181  | gamma-Butyrobetaine                | 0.053±0.011     | 0.049±0.0045    | 0.060±0.011     | 0.92     | 0.82     | 0.82     |
| C00329  | Glucosamine                        | 0.083±0.0       | 0.0±0.0         | 0.025±0.0031    | 0.58     | 0.40     | 0.078    |
| C00191  | Glucuronate                        | 0.0±0.0         | 0.0±0.0         | 0.028±0.0019    | N.A.     | 0.16     | 0.16     |

|         |                                  |                |                |                |       |       |       |
|---------|----------------------------------|----------------|----------------|----------------|-------|-------|-------|
| C00127  | Glutathione(ox)                  | 0.0032±0.0     | 0.010±0.0011   | 0.0026±0.0     | 0.21  | 1.0   | 0.21  |
| C00037  | Glycine                          | 2.0±0.52       | 2.1±0.42       | 3.7±0.65       | 0.59  | 0.12  | 0.25  |
| C00093  | Glycerophosphate                 | 0.25±0.062     | 0.22±0.019     | 0.26±0.035     | 0.89  | 0.77  | 0.95  |
| C00160  | Glycolate                        | 0.20±0.019     | 0.32±0.038     | 0.22±0.020     | 0.050 | 0.68  | 0.072 |
| C17714  | Heptanoate                       | 0.0089±0.0015  | 0.027±0.0039   | 0.017±0.0      | 0.18  | 0.88  | 0.11  |
| C01585  | Hexanoate                        | 0.53±0.13      | 0.50±0.085     | 0.31±0.060     | 0.99  | 0.59  | 0.29  |
| C00388  | Histamine                        | 0.023±0.0094   | 0.063±0.018    | 0.022±0.0069   | 0.92  | 0.97  | 0.77  |
| C00263  | Homoserine                       | 0.014±0.0011   | 0.025±0.0      | 0.015±0.0015   | 0.23  | 1.0   | 0.23  |
| C05582  | Homovanillate                    | 0.13±0.026     | 0.20±0.029     | 0.15±0.028     | 0.22  | 0.86  | 0.40  |
| C01015  | Hydroxyproline                   | 0.018±0.0028   | 0.034±0.0041   | 0.026±0.0042   | 0.97  | 0.86  | 0.99  |
| C00519  | Hypotaurine                      | 0.041±0.0046   | 0.10±0.0075    | 0.039±0.0019   | 1.0   | 0.62  | 0.71  |
| C00407  | Isoleucine                       | 0.14±0.060     | 0.060±0.014    | 0.14±0.035     | 0.77  | 0.89  | 0.16  |
| C00954  | Indole-3-acetate                 | 0.054±0.0069   | 0.082±0.0049   | 0.040±0.00086  | 0.74  | 0.33  | 0.98  |
| C05771  | Isopropanolamine                 | 0.017±0.0027   | 0.017±0.0013   | 0.011±0.0015   | 1.0   | 0.16  | 0.072 |
| C00123  | Leucine                          | 0.36±0.12      | 0.17±0.040     | 0.34±0.073     | 0.45  | 0.89  | 0.25  |
| C00073  | Methionine                       | 0.28±0.099     | 0.073±0.0043   | 0.071±0.014    | 1.0   | 0.32  | 0.20  |
| C00612  | N1-Acetylspermidine              | 0.011±0.0032   | 0.020±0.0043   | 0.023±0.0062   | 1.0   | 0.54  | 0.72  |
| C01029  | N8-Acetylspermidine              | 0.0069±0.0     | 0.0±0.0        | 0.0059±0.00028 | 0.58  | 0.88  | 0.31  |
| C01073  | N-Acetyl-beta-alanine            | 0.021±0.0012   | 0.043±0.0      | 0.031±0.0016   | 0.12  | 0.87  | 0.63  |
| C00357  | N-Acetylglucosamine 6-phosphate  | 0.030±0.0077   | 0.0±0.0        | 0.0±0.0        | 0.31  | 0.31  | N.A.  |
| C00624  | N-Acetylglutamate                | 0.0064±0.00092 | 0.013±0.0013   | 0.013±0.0023   | 0.72  | 0.050 | 0.081 |
| C02710  | N-Acetylleucine                  | 0.0056±0.00073 | 0.0±0.0        | 0.0±0.0        | 0.16  | 0.16  | N.A.  |
| C00270  | N-Acetylneuraminate              | 1.7±0.31       | 2.0±0.49       | 2.3±0.54       | 1.0   | 0.68  | 0.54  |
| C03519  | N-Acetylphenylalanine            | 0.0077±0.00080 | 0.013±0.0      | 0.0±0.0        | 0.63  | 0.16  | 0.58  |
| C02714  | N-Acetylputrescine               | 0.040±0.0065   | 0.046±0.0071   | 0.068±0.011    | 0.82  | 0.22  | 0.29  |
| C01047  | N-gamma-Ethylglutamine           | 0.011±0.0011   | 0.017±0.0014   | 0.013±0.0018   | 0.92  | 0.94  | 0.98  |
| C00153  | Nicotinamide                     | 0.013±0.0031   | 0.024±0.0017   | 0.013±0.0014   | 0.77  | 0.56  | 0.18  |
| C00253  | Nicotinate                       | 0.051±0.0047   | 0.24±0.087     | 0.098±0.019    | 0.68  | 0.16  | 0.12  |
| C02571  | o-Acetylcarnitine                | 0.020±0.0026   | 0.023±0.00082  | 0.03±0.0046    | 0.072 | 0.06  | 0.64  |
| C00295  | Orotate                          | 0.026±0.0030   | 0.040±0.0      | 0.049±0.0048   | 0.23  | 0.67  | 0.11  |
| C00864  | Pantothenate                     | 0.0070±0.00069 | 0.0±0.0        | 0.0089±0.00095 | 0.31  | 0.77  | 0.16  |
| C00803  | Pentanoate                       | 0.56±0.086     | 0.54±0.060     | 0.44±0.088     | 0.95  | 0.54  | 0.32  |
| +C08262 | + 3-Methylbutanoate <sup>e</sup> |                |                |                |       |       |       |
| C00079  | Phenylalanine                    | 0.55±0.099     | 0.57±0.096     | 0.62±0.11      | 0.97  | 0.95  | 0.95  |
| C00166  | Phenylpyruvate                   | 0.028±0.0      | 0.0±0.0        | 0.058±0.0047   | 0.58  | 0.43  | 0.16  |
| C00642  | p-Hydroxyphenylacetate           | 0.42±0.10      | 0.36±0.045     | 0.37±0.11      | 0.92  | 0.81  | 0.95  |
| C00148  | Proline                          | 1.2±0.37       | 1.2±0.36       | 2.9±0.56       | 1.0   | 0.086 | 0.12  |
| C10172  | Proline betaine                  | 0.010±0.0028   | 0.017±0.0035   | 0.013±0.0017   | 0.95  | 0.99  | 0.92  |
| C00163  | Propionate                       | 12.0±2.8       | 11.0±1.6       | 8.1±1.8        | 1.0   | 0.64  | 0.32  |
| C00134  | Putrescine(1,4-Butanediamine)    | 1.6±0.30       | 1.4±0.22       | 1.9±0.31       | 1.0   | 0.86  | 0.40  |
| C00255  | Riboflavin                       | 0.18±0.039     | 0.22±0.033     | 0.17±0.023     | 0.95  | 0.95  | 0.54  |
| C05382  | Sedoheptulose 7-phosphate        | 0.034±0.0024   | 0.049±0.0031   | 0.091±0.015    | 1.0   | 0.082 | 0.082 |
| C00449  | Saccharopine                     | 0.007±0.0005   | 0.0±0.0        | 0.013±0.00086  | 0.16  | 0.59  | 0.078 |
| C00213  | Sarcosine                        | 0.16±0.018     | 0.2±0.022      | 0.19±0.039     | 0.45  | 1.0   | 0.86  |
| C08277  | Sebacate                         | 0.0059±0.0     | 0.0058±0.00047 | 0.0±0.0        | 0.49  | 0.58  | 0.16  |
| C00750  | Spermine                         | 0.0076±0.0017  | 0.0±0.0        | 0.0±0.0        | 0.31  | 0.31  | N.A.  |
| C00042  | Succinate                        | 1.6±0.37       | 1.8±0.33       | 1.7±0.43       | 0.89  | 1.0   | 0.95  |
| C01959  | Taurocyamine                     | 0.17±0.034     | 0.31±0.020     | 0.20±0.041     | 0.82  | 0.83  | 1.0   |
| C00188  | Threonine                        | 0.10±0.048     | 0.078±0.0088   | 0.14±0.028     | 0.68  | 0.22  | 0.25  |
| C01620  | Threonate                        | 0.38±0.094     | 0.34±0.057     | 0.31±0.071     | 0.99  | 0.92  | 0.68  |
| C00214  | Thymidine                        | 0.078±0.011    | 0.20±0.00037   | 0.11±0.0016    | 0.98  | 0.95  | 0.97  |
| C01004  | Trigonelline                     | 0.0098±0.0     | 0.015±0.0      | 0.0064±0.0010  | 1.0   | 0.88  | 0.88  |
| C01104  | Trimethylamine N-oxide           | 0.015±0.0058   | 0.035±0.012    | 0.018±0.0067   | 0.62  | 0.73  | 0.29  |
| C00078  | Tryptophan                       | 0.036±0.0093   | 0.026±0.0037   | 0.042±0.0074   | 0.94  | 0.84  | 0.47  |
| C00082  | Tyrosine                         | 0.56±0.097     | 0.59±0.075     | 1±0.15         | 1.0   | 0.12  | 0.14  |
| C00483  | Tyramine                         | 0.027±0.0079   | 0.046±0.014    | 0.025±0.0013   | 0.99  | 1.0   | 1.0   |

|        |         |            |            |            |      |      |      |
|--------|---------|------------|------------|------------|------|------|------|
| C00366 | Urate   | 6.6±1.2    | 6.9±1.1    | 6.7±1.1    | 1.0  | 0.99 | 1.0  |
| C00086 | Urea    | 36.0±7.2   | 28.0±4.7   | 25.0±8.2   | 0.64 | 0.59 | 0.73 |
| C00299 | Uridine | 0.15±0.026 | 0.26±0.034 | 0.17±0.022 | 0.66 | 0.25 | 0.82 |
| C00183 | Valine  | 0.46±0.19  | 0.25±0.063 | 0.35±0.081 | 1.0  | 0.95 | 0.68 |

\*Steel-Dwass test

<sup>a</sup>Unstimulated Saliva

<sup>b</sup>Mouth-rinsed Water

<sup>c</sup>Stimulated Saliva

<sup>d</sup>5-Aminoimidazole-4-carboxamide ribonucleotide

<sup>e</sup>For pentanoate and 3-Methylbutanoate, the peaks were not sufficiently separated in the CE-TOFMS analysis, so the two metabolites were quantified together.

**Supplementary Table S2.** List of 186 metabolites used for quantitative analysis.

| KEGG ID | Compound Name                 | Classification <sup>a</sup> | Cluster  |
|---------|-------------------------------|-----------------------------|----------|
| C04137  | Octopine                      | 2-Heteroaryl carboxamides   | Cluster1 |
| C00019  | S-Adenosylmethionine          | 5'-Deoxyribonucleosides     | Cluster1 |
| C05198  | 5'-Deoxyadenosine             | 5'-Deoxyribonucleosides     | Cluster1 |
| -       | N1,N8-Diacetylspermidine      | Acetamides                  | Cluster1 |
| C02571  | o-Acetylcarnitine             | Acyl carnitines             | Cluster1 |
| C00719  | Betaine                       | Alpha amino acids           | Cluster1 |
| C01005  | O-Phosphoserine               | Alpha amino acids           | Cluster1 |
| C00077  | Ornithine                     | Alpha amino acids           | Cluster1 |
| C00408  | Pipecolate                    | Alpha amino acids           | Cluster1 |
| C00213  | Sarcosine                     | Alpha amino acids           | Cluster1 |
| C05984  | 2-Hydroxybutyrate             | Alpha hydroxy acids         | Cluster1 |
| C00186  | Lactate                       | Alpha hydroxy acids         | Cluster1 |
| C00022  | Pyruvate                      | Alpha keto acids            | Cluster1 |
| C00986  | 1,3-Diaminopropane            | Amines                      | Cluster1 |
| C05127  | 1-Methylhistamine             | Amines                      | Cluster1 |
| C01672  | Cadaverine                    | Amines                      | Cluster1 |
| C00134  | Putrescine(1,4-Butanediamine) | Amines                      | Cluster1 |
| C00315  | Spermidine                    | Amines                      | Cluster1 |
| C01152  | 3-Methylhistidine             | Amino acid derivatives      | Cluster1 |
| C00956  | alpha-Aminoadipate            | Amino acid derivatives      | Cluster1 |
| C00327  | Citrulline                    | Amino acid derivatives      | Cluster1 |
| C00300  | Creatine                      | Amino acid derivatives      | Cluster1 |
| C00791  | Creatinine                    | Amino acid derivatives      | Cluster1 |
| C00506  | Cysteate                      | Amino acid derivatives      | Cluster1 |
| C00606  | Cysteine sulfinat             | Amino acid derivatives      | Cluster1 |
| C00491  | Cystine                       | Amino acid derivatives      | Cluster1 |
| C01015  | Hydroxyproline                | Amino acid derivatives      | Cluster1 |
| C01042  | N-Acetylaspartate             | Amino acid derivatives      | Cluster1 |
| C00624  | N-Acetylglutamate             | Amino acid derivatives      | Cluster1 |
| C01047  | N-gamma-Ethylglutamine        | Amino acid derivatives      | Cluster1 |
| C00449  | Saccharopine                  | Amino acid derivatives      | Cluster1 |
| C00041  | Alanine                       | Amino acids                 | Cluster1 |
| C00062  | Arginine                      | Amino acids                 | Cluster1 |
| C00049  | Aspartate                     | Amino acids                 | Cluster1 |
| C00064  | Glutamine                     | Amino acids                 | Cluster1 |
| C00025  | Glutamate                     | Amino acids                 | Cluster1 |
| C00037  | Glycine                       | Amino acids                 | Cluster1 |
| C00135  | Histidine                     | Amino acids                 | Cluster1 |
| C00047  | Lysine                        | Amino acids                 | Cluster1 |
| C00079  | Phenylalanine                 | Amino acids                 | Cluster1 |
| C00148  | Proline                       | Amino acids                 | Cluster1 |
| C00065  | Serine                        | Amino acids                 | Cluster1 |
| C00188  | Threonine                     | Amino acids                 | Cluster1 |
| C00078  | Tryptophan                    | Amino acids                 | Cluster1 |
| C00082  | Tyrosine                      | Amino acids                 | Cluster1 |
| C00108  | Anthranilate                  | Aminobenzoic acids          | Cluster1 |
| C00099  | beta-Alanine                  | Beta amino acids            | Cluster1 |
| C01089  | 3-Hydroxybutyrate             | Beta hydroxy acids          | Cluster1 |
| C03413  | N1,N12-Diacetylspermine       | Carboximidic acids          | Cluster1 |
| C00612  | N1-Acetylspermidine           | Carboximidic acids          | Cluster1 |
| C02714  | N-Acetylputrescine            | Carboximidic acids          | Cluster1 |
| C00318  | Carnitine                     | Carnitines                  | Cluster1 |
| C00114  | Choline                       | Cholines                    | Cluster1 |
| C00423  | trans-Cinnamate               | Cinnamic acids              | Cluster1 |

|          |                                 |                                |          |
|----------|---------------------------------|--------------------------------|----------|
| C00042   | Succinate                       | Dicarboxylic acids             | Cluster1 |
| C00993   | Alanyl-alanine                  | Dipeptides                     | Cluster1 |
| C01425   | Glutamyl-glutamate              | Dipeptides                     | Cluster1 |
| C02037   | Glycyl-glycine                  | Dipeptides                     | Cluster1 |
| C02155   | Glycyl-Leucine                  | Dipeptides                     | Cluster1 |
| -        | Phenylalanyl-phenylalanine      | Dipeptides                     | Cluster1 |
| C00334   | Gamma-Aminobutyric acid         | Gamma amino acids              | Cluster1 |
| C00191   | Glucuronate                     | Glucuronic acid derivatives    | Cluster1 |
| C00879   | Mucate                          | Glucuronic acid derivatives    | Cluster1 |
| C00093   | Glycerophosphate                | Glycerophosphates              | Cluster1 |
| C00179   | Agmatine                        | Guanidines                     | Cluster1 |
| C00354   | Fructose 1,6-bisphosphate       | Hexose phosphates              | Cluster1 |
| C00085   | Fructose 6-phosphate            | Hexose phosphates              | Cluster1 |
| C00092   | Glucose 6-phosphate             | Hexose phosphates              | Cluster1 |
| C05382   | Sedoheptulose 7-phosphate       | Hexose phosphates              | Cluster1 |
| C00386   | Carnosine                       | Hybrid peptides                | Cluster1 |
| -        | 2-Hydroxypentanoate             | Hydroxy fatty acids            | Cluster1 |
| C00178   | Thymine                         | Hydroxypyrimidines             | Cluster1 |
| C02242   | 7-Methylguanine                 | Hypoxanthines                  | Cluster1 |
| C00262   | Hypoxanthine                    | Hypoxanthines                  | Cluster1 |
| C00785   | Urocanate                       | Imidazoles                     | Cluster1 |
| C00345   | 6-Phosphogluconate              | Monosaccharide phosphates      | Cluster1 |
| C00111   | Dihydroxyacetone phosphate      | Monosaccharide phosphates      | Cluster1 |
| C00103   | Glucose 1-phosphate             | Monosaccharide phosphates      | Cluster1 |
| C04501   | N-Acetylglucosamine 1-phosphate | N-acyl-alpha-hexosamines       | Cluster1 |
| C00270   | N-Acetylneuraminic acid         | N-acylneuraminic acids         | Cluster1 |
| C00245   | Taurine                         | Organosulfonic acids           | Cluster1 |
| C01959   | Taurocyamine                    | Organosulfonic acids           | Cluster1 |
| C00117   | Ribose 5-phosphate              | Pentose phosphates             | Cluster1 |
| C00199   | Ribulose 5-phosphate            | Pentose phosphates             | Cluster1 |
| C00672   | 2-Deoxyribose 1-phosphate       | Pentoses                       | Cluster1 |
| C05607   | 3-Phenyllactate                 | Phenylpropanoic acids          | Cluster1 |
| C00166   | Phenylpyruvate                  | Phenylpyruvic acid derivatives | Cluster1 |
| C00074   | Phosphoenolpyruvate             | Phosphate esters               | Cluster1 |
| C00212   | Adenosine                       | Purine nucleosides             | Cluster1 |
| C00387   | Guanosine                       | Purine nucleosides             | Cluster1 |
| C00330   | 2'-Deoxyguanosine               | Purine nucleosides             | Cluster1 |
| C00294   | Inosine                         | Purine nucleosides             | Cluster1 |
| C00242   | Guanine                         | Purines                        | Cluster1 |
| C00147   | Adenine                         | Purines                        | Cluster1 |
| C00253   | Nicotinate                      | Pyridinecarboxylic acids       | Cluster1 |
| C00881   | 2'-Deoxycytidine                | Pyrimidine nucleosides         | Cluster1 |
| C00299   | Uridine                         | Pyrimidine nucleosides         | Cluster1 |
| C00106   | Uracil                          | Pyrimidines                    | Cluster1 |
| C00493   | Shikimate                       | Shikimic acids and derivatives | Cluster1 |
| C02630 + | 2-Hydroxyglutarate +            | Short-chain hydroxy acids +    | Cluster1 |
| C00815   | Citramalate*                    | Hydroxy fatty acids            | Cluster1 |
| C00109   | 2-Oxobutyrate                   | Short-chain keto acids         | Cluster1 |
| C00026   | 2-Oxoglutarate                  | Short-chain keto acids         | Cluster1 |
| C00141   | 2-Oxoisopentanoate              | Short-chain keto acids         | Cluster1 |
| C00233   | 4-Methyl-2-oxopentanoate        | Short-chain keto acids         | Cluster1 |
| C00631 + | 2-Phosphoglycerate +            | Sugar acids                    | Cluster1 |
| C00197   | 3-Phosphoglycerate*             |                                |          |
| C00440   | 5-Methyltetrahydrofolate        | Tetrahydrofolic acids          | Cluster1 |
| C00417   | cis-Aconitate                   | Tricarboxylic acids            | Cluster1 |
| C00158   | Citrate                         | Tricarboxylic acids            | Cluster1 |

|          |                                    |                                  |          |
|----------|------------------------------------|----------------------------------|----------|
| C00311   | Isocitrate                         | Tricarboxylic acids              | Cluster1 |
| C00140   | N-Acetylglucosamine                | Acylaminosugars                  | Cluster2 |
| C00357   | N-Acetylglucosamine 6-phosphate    | Acylaminosugars                  | Cluster2 |
| C02356   | 2-Aminobutyrate                    | Alpha amino acids                | Cluster2 |
| C00263   | Homoserine                         | Alpha amino acids                | Cluster2 |
| C00388   | Histamine                          | Amines                           | Cluster2 |
| C05771   | Isopropanolamine                   | Amines                           | Cluster2 |
| C00750   | Spermine                           | Amines                           | Cluster2 |
| C00430   | 5-Aminolevulinate                  | Amino acid derivatives           | Cluster2 |
| C00431   | 5-Aminovalerate                    | Amino acid derivatives           | Cluster2 |
| C02710   | N-Acetyl-leucine                   | Amino acid derivatives           | Cluster2 |
| C03519   | N-Acetylphenylalanine              | Amino acid derivatives           | Cluster2 |
| C00407   | Isoleucine                         | Amino acids                      | Cluster2 |
| C00123   | Leucine                            | Amino acids                      | Cluster2 |
| C00073   | Methionine                         | Amino acids                      | Cluster2 |
| C00183   | Valine                             | Amino acids                      | Cluster2 |
| C09815   | Benzamide                          | Benzamides                       | Cluster2 |
| C01029   | N8-Acetylspermidine                | Carboximidic acids               | Cluster2 |
| C01073   | N-Acetyl-beta-alanine              | Carboxylic acids                 | Cluster2 |
| C00163   | Propionate                         | Carboxylic acids                 | Cluster2 |
| C00329   | Glucosamine                        | Hexoses                          | Cluster2 |
| C03264   | 2-Hydroxy-4-methylpentanoate       | Hydroxy fatty acids              | Cluster2 |
| C03761   | 3-Hydroxy-3-methylglutarate        | Hydroxy fatty acids              | Cluster2 |
| C00954   | Indole-3-acetate                   | Indole-3-acetic acid derivatives | Cluster2 |
| C05135   | 4-(beta-Acetylaminoethyl)imidazole | N-acetyl-2-arylethylamines       | Cluster2 |
| C05123   | Isethionate                        | Organosulfonic acids             | Cluster2 |
| C11527   | 4-Hydroxymandelate                 | Phenols                          | Cluster2 |
| C00642   | p-Hydroxyphenylacetate             | Phenols                          | Cluster2 |
| C01744   | 3-(4-Hydroxyphenyl)propionate      | Phenylpropanoic acids            | Cluster2 |
| C05629   | 3-Phenylpropionate                 | Phenylpropanoic acids            | Cluster2 |
| C00295   | Orotate                            | Pyrimidinecarboxylic acids       | Cluster2 |
| C11118   | 1-Methyl-2-pyrrolidinone           | Pyrrolidones                     | Cluster2 |
| C00864   | Pantothenate                       | Secondary alcohols               | Cluster2 |
| C00246   | Butyrate                           | Straight chain fatty acids       | Cluster2 |
| C01771   | Crotonate                          | Straight chain fatty acids       | Cluster2 |
| C01181   | gamma-Butyrobetaine                | Straight chain fatty acids       | Cluster2 |
| C01585   | Hexanoate                          | Straight chain fatty acids       | Cluster2 |
| C00803 + | Pentanoate +                       | Straight chain fatty acids +     | Cluster2 |
| C08262   | 3-Methylbutanoate*                 | Methyl-branched fatty acids      | Cluster2 |
| C01620   | Threonate                          | Sugar acids                      | Cluster2 |
| C04677   | AICAR <sup>b</sup>                 | 1-Ribosyl-imidazolecarboxamides  | Cluster3 |
| C01004   | Trigonelline                       | Alkaloids and derivatives        | Cluster3 |
| C00160   | Glycolate                          | Alpha hydroxy acids              | Cluster3 |
| C06772   | Diethanolamine                     | Amines                           | Cluster3 |
| C01879   | 5-Oxoproline                       | Amino acid derivatives           | Cluster3 |
| C10172   | Proline betaine                    | Amino acid derivatives           | Cluster3 |
| C00152   | Asparagine                         | Amino acids                      | Cluster3 |
| C01104   | Trimethylamine N-oxide             | Aminoxides                       | Cluster3 |
| C01606   | Phthalate                          | Benzoic acids                    | Cluster3 |
| C05145   | 3-Aminoisobutyrate                 | Beta amino acids                 | Cluster3 |
| C01013   | 3-Hydroxypropionate                | Beta amino acids                 | Cluster3 |
| C00711   | Malate                             | Beta hydroxy acids               | Cluster3 |
| C00120   | Biotin                             | Biotin and derivatives           | Cluster3 |
| C00122   | Fumarate                           | Dicarboxylic acids               | Cluster3 |
| C00383   | Malonate                           | Dicarboxylic acids               | Cluster3 |
| C00255   | Riboflavin                         | Flavins                          | Cluster3 |

|        |                        |                                  |          |
|--------|------------------------|----------------------------------|----------|
| C02504 | 2-Isopropylmalate      | Hydroxy fatty acids              | Cluster3 |
| C01551 | Allantoin              | Imidazoles                       | Cluster3 |
| C05660 | 5-Methoxyindoleacetate | Indole-3-acetic acid derivatives | Cluster3 |
| C06104 | Adipate                | Medium-chain fatty acids         | Cluster3 |
| C17714 | Heptanoate             | Medium-chain fatty acids         | Cluster3 |
| C01601 | Pelargonate            | Medium-chain fatty acids         | Cluster3 |
| C08277 | Sebacate               | Medium-chain fatty acids         | Cluster3 |
| C08261 | Azelate                | Medium-chain fatty acids         | Cluster3 |
| C02678 | Dodecanedioate         | Medium-chain fatty acids         | Cluster3 |
| C02774 | 10-Hydroxydecanoate    | Medium-chain hydroxy acids       | Cluster3 |
| C00153 | Nicotinamide           | Nicotinamides                    | Cluster3 |
| C00127 | Glutathione(ox)        | Peptides                         | Cluster3 |
| C00483 | Tyramine               | Phenethylamines                  | Cluster3 |
| C05582 | Homovanillate          | Phenols                          | Cluster3 |
| C00588 | Phosphorylcholine      | Phosphocholines                  | Cluster3 |
| C00346 | Ethanolamine phosphate | Phosphoethanolamines             | Cluster3 |
| C00475 | Cytidine               | Pyrimidine nucleosides           | Cluster3 |
| C00214 | Thymidine              | Pyrimidine nucleosides           | Cluster3 |
| C00055 | Cytidine monophosphate | Pyrimidine ribonucleotides       | Cluster3 |
| C00519 | Hypotaurine            | Sulfinic acids                   | Cluster3 |
| C00086 | Urea                   | Ureas                            | Cluster3 |
| C00366 | Urate                  | Xanthines                        | Cluster3 |
| C00628 | 2,5-Dihydroxybenzoate  | Benzoic acids                    | —        |

\* For these metabolites, the two peaks were not sufficiently separated in the CE-TOFMS analysis, so the two metabolites were quantified together.

<sup>A</sup>Classified by Human Metabolome Database

<sup>b</sup>5-Aminoimidazole-4-carboxamide ribonucleotide



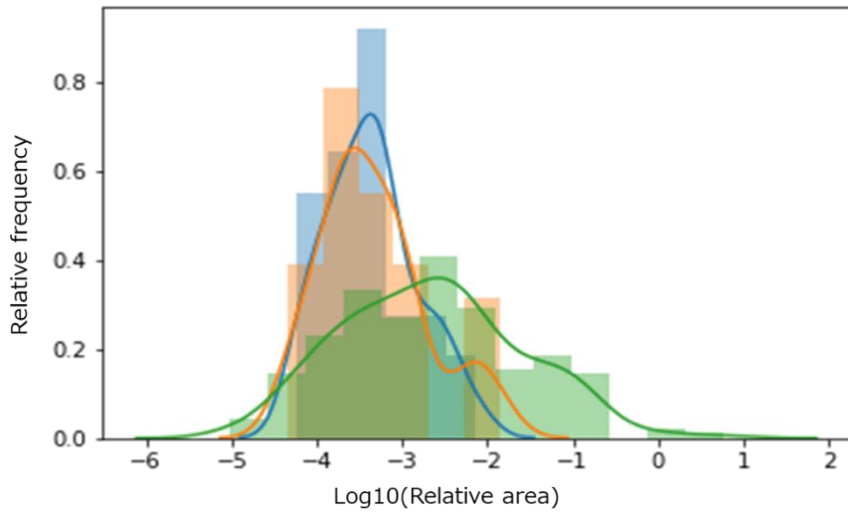

**Supplementary Figure S1.** Histogram and kernel density estimation of relative area values of oral metabolites. The blue bar represents the metabolites detected in unstimulated saliva (US) samples but not detected in mouth-rinsed water (MW) samples; the orange bar represents the metabolites detected in stimulated saliva (SS) samples but not detected in MW samples; and the green bar represents the frequency of all metabolites detected.
