# Supplementary material for: Comparison of oral metabolome profiles of stimulated saliva, unstimulated saliva, and mouth-rinsed water
Source: PubMed Central journal article supplement (PMC8758762; doi:10.1038/s41598-021-04612-x), 2022-01-13
Supplement: 41598_2021_4612_MOESM3_ESM.pdf [file 41598_2021_4612_MOESM3_ESM.pdf]

Supplemental Table S4. Metabolite concentration ratios of unstimulated saliva (US), stimulated saliva (SS), and mouth-rinsed water (MW) samples (%).

| KEGG ID | Compound Name                      | Ave n/z  | Ave ComM | US (%) |       |        |       |        |        |       |       |       |       | MW (%) |       |       |       |       |       |       |       |       |       | SS (%) |       |        |       |        |        |        |       |        |        |       |
|---------|------------------------------------|----------|----------|--------|-------|--------|-------|--------|--------|-------|-------|-------|-------|--------|-------|-------|-------|-------|-------|-------|-------|-------|-------|--------|-------|--------|-------|--------|--------|--------|-------|--------|--------|-------|
|         |                                    |          |          | B01    | B02   | B03    | B04   | B05    | B06    | B07   | B08   | B09   | B10   | B01    | B02   | B03   | B04   | B05   | B06   | B07   | B08   | B09   | B10   | B01    | B02   | B03    | B04   | B05    | B06    | B07    | B08   | B09    | B10    |       |
| C00886  | Urea                               | 61.0404  | 33.0     | 53.6   | 20.9  | 43.2   | 37.2  | 69.0   | 0.14   | 4.9   | 60.9  | 26.9  | 42.3  | 31.4   | 8.6   | 44.2  | 30.4  | 53.3  | 9.9   | 23.1  | 42.6  | 34.8  | 20.6  | 55.1   | 2.1   | 3.3    | 11.1  | 66.3   | 3.0    | 29.3   | 60.0  | 2.7    | 20.1   |       |
| C00481  | Pyrazole                           | 69.0444  | 0.0      | 0.0    | 0.0   | 0.0    | 0.0   | 0.0    | 0.0    | 0.0   | 0.0   | 0.0   | 0.0   | 0.0    | 0.0   | 0.0   | 0.0   | 0.0   | 0.0   | 0.0   | 0.0   | 0.0   | 0.0   | 0.0    | 0.0   | 0.0    | 0.0   | 0.0    | 0.0    | 0.0    | 0.0   | 0.0    | 0.0    |       |
| C05670  | 3-Aminopropionitrile               | 71.0607  | 0.0      | 0.0    | 0.0   | 0.0    | 0.0   | 0.0    | 0.0    | 0.0   | 0.0   | 0.0   | 0.0   | 0.0    | 0.0   | 0.0   | 0.0   | 0.0   | 0.0   | 0.0   | 0.0   | 0.0   | 0.0   | 0.0    | 0.0   | 0.0    | 0.0   | 0.0    | 0.0    | 0.0    | 0.0   | 0.0    | 0.0    |       |
| C02244  | Methylguanidine                    | 74.0713  | 0.0      | 0.0    | 0.0   | 0.0    | 0.0   | 0.0    | 0.0    | 0.0   | 0.0   | 0.0   | 0.0   | 0.0    | 0.0   | 0.0   | 0.0   | 0.0   | 0.0   | 0.0   | 0.0   | 0.0   | 0.0   | 0.0    | 0.0   | 0.0    | 0.0   | 0.0    | 0.0    | 0.0    | 0.0   | 0.0    | 0.0    |       |
| C02782  | Isobutylamine                      | 74.0909  | 11.0     | 0.0    | 0.0   | 0.0    | 0.0   | 0.0    | 0.0    | 0.0   | 0.0   | 0.0   | 0.0   | 0.0    | 0.0   | 0.0   | 0.0   | 0.0   | 0.0   | 0.0   | 0.0   | 0.0   | 0.0   | 0.0    | 0.0   | 0.0    | 0.0   | 0.0    | 0.0    | 0.0    | 0.0   | 0.0    | 0.0    |       |
| C00986  | 1,3-Diaminopropane                 | 75.0911  | 6.9      | 0.0    | 0.017 | 0.044  | 0.015 | 0.0    | 0.077  | 0.046 | 0.0   | 0.019 | 0.014 | 0.082  | 0.031 | 0.0   | 0.038 | 0.0   | 0.044 | 0.0   | 0.0   | 0.0   | 0.0   | 0.048  | 0.027 | 0.084  | 0.27  | 0.16   | 0.023  | 0.062  | 0.031 | 0.017  | 0.069  | 0.083 |
| C00037  | Gly                                | 76.0396  | 13.0     | 1.1    | 5.1   | 1.1    | 1.2   | 0.40   | 2.2    | 4.8   | 0.72  | 1.9   | 1.4   | 2.6    | 5.6   | 1.2   | 2.4   | 0.99  | 1.4   | 2.3   | 1.3   | 1.7   | 1.8   | 1.6    | 5.9   | 5.0    | 3.3   | 6.8    | 4.9    | 6.4    | 1.2   | 5.2    | 3.3    |       |
| C01104  | Trimethylamine N-oxide             | 76.0758  | 10.0     | 0.010  | 0.010 | 0.0052 | 0.010 | 0.0073 | 0.0    | 0.043 | 0.056 | 0.0   | 0.0   | 0.0    | 0.0   | 0.0   | 0.0   | 0.015 | 0.0   | 0.0   | 0.0   | 0.0   | 0.0   | 0.013  | 0.014 | 0.0099 | 0.017 | 0.0092 | 0.0    | 0.0054 | 0.069 | 0.0    | 0.0041 |       |
| C05721  | Isopropylamine                     | 76.0759  | 11.0     | 0.011  | 0.015 | 0.012  | 0.021 | 0.0065 | 0.033  | 0.022 | 0.011 | 0.027 | 0.011 | 0.019  | 0.017 | 0.0   | 0.018 | 0.015 | 0.023 | 0.022 | 0.013 | 0.018 | 0.010 | 0.0070 | 0.013 | 0.010  | 0.014 | 0.0092 | 0.0015 | 0.0075 | 0.019 | 0.0074 |        |       |
| C02044  | Hydroxyurea                        | 77.0865  | 34.4     | 0.0    | 0.0   | 0.0    | 0.0   | 0.0    | 0.0    | 0.0   | 0.0   | 0.0   | 0.0   | 0.0    | 0.0   | 0.0   | 0.0   | 0.0   | 0.0   | 0.0   | 0.0   | 0.0   | 0.0   | 0.0    | 0.0   | 0.0    | 0.0   | 0.0    | 0.0    | 0.0    | 0.0   | 0.0    | 0.0    |       |
| C01008  | Trimethylsulfonium                 | 77.0422  | 9.1      | 0.0    | 0.0   | 0.0    | 0.0   | 0.0    | 0.0    | 0.0   | 0.0   | 0.0   | 0.0   | 0.0    | 0.0   | 0.0   | 0.0   | 0.0   | 0.0   | 0.0   | 0.0   | 0.0   | 0.0   | 0.0    | 0.0   | 0.0    | 0.0   | 0.0    | 0.0    | 0.0    | 0.0   | 0.0    | 0.0    |       |
| C01678  | Cysteamine                         | 78.0366  | 10.0     | 0.0    | 0.0   | 0.0    | 0.0   | 0.0    | 0.0    | 0.0   | 0.0   | 0.0   | 0.0   | 0.0    | 0.0   | 0.0   | 0.0   | 0.0   | 0.0   | 0.0   | 0.0   | 0.0   | 0.0   | 0.0    | 0.0   | 0.0    | 0.0   | 0.0    | 0.0    | 0.0    | 0.0   | 0.0    | 0.0    |       |
| C02640  | Sarcosine                          | 88.1124  | 11.7     | 0.0    | 0.0   | 0.0    | 0.0   | 0.0    | 0.0    | 0.0   | 0.0   | 0.0   | 0.0   | 0.0    | 0.0   | 0.0   | 0.0   | 0.0   | 0.0   | 0.0   | 0.0   | 0.0   | 0.0   | 0.0    | 0.0   | 0.0    | 0.0   | 0.0    | 0.0    | 0.0    | 0.0   | 0.0    | 0.0    |       |
| C01014  | Putrescine(1,4-Butanediamine)      | 89.1076  | 7.3      | 0.80   | 3.0   | 1.1    | 1.5   | 0.47   | 2.7    | 3.0   | 0.74  | 1.4   | 1.1   | 1.3    | 3.0   | 0.55  | 1.8   | 0.62  | 1.2   | 1.7   | 1.1   | 0.94  | 1.6   | 0.87   | 3.5   | 2.6    | 2.5   | 0.48   | 2.4    | 2.3    | 0.66  | 1.9    | 1.7    |       |
| C00929  | Betaine                            | 90.0551  | 11.5     | 0.041  | 0.056 | 0.055  | 0.032 | 0.016  | 0.044  | 0.041 | 0.032 | 0.043 | 0.029 | 0.065  | 0.049 | 0.044 | 0.042 | 0.030 | 0.054 | 0.033 | 0.069 | 0.059 | 0.051 | 0.028  | 0.026 | 0.082  | 0.051 | 0.011  | 0.029  | 0.020  | 0.038 | 0.062  | 0.039  |       |
| C00041  | Ala                                | 90.0551  | 14.2     | 0.35   | 0.72  | 0.48   | 0.49  | 0.15   | 2.6    | 3.7   | 0.21  | 0.55  | 0.29  | 0.68   | 0.87  | 0.45  | 0.81  | 0.31  | 1.0   | 0.32  | 0.47  | 0.77  | 0.46  | 0.45   | 1.5   | 2.0    | 1.7   | 0.26   | 1.8    | 0.37   | 0.45  | 2.0    | 0.86   |       |
| C00213  | Sarcosine                          | 90.0551  | 14.8     | 0.11   | 0.17  | 0.15   | 0.20  | 0.062  | 0.21   | 0.21  | 0.093 | 0.24  | 0.12  | 0.18   | 0.23  | 0.16  | 0.34  | 0.11  | 0.22  | 0.17  | 0.15  | 0.29  | 0.13  | 0.070  | 0.19  | 0.19   | 0.31  | 0.044  | 0.30   | 0.16   | 0.079 | 0.42   | 0.11   |       |
| C00657  | 3-Aminopropane-1,2-diol            | 92.0711  | 11.5     | 0.0    | 0.0   | 0.0    | 0.0   | 0.0    | 0.0    | 0.0   | 0.0   | 0.0   | 0.0   | 0.0    | 0.0   | 0.0   | 0.0   | 0.0   | 0.0   | 0.0   | 0.0   | 0.0   | 0.0   | 0.0    | 0.0   | 0.0    | 0.0   | 0.0    | 0.0    | 0.0    | 0.0   | 0.0    | 0.0    |       |
| C02092  | Aniline                            | 94.0655  | 11.2     | 0.0    | 0.0   | 0.0    | 0.0   | 0.0    | 0.0    | 0.0   | 0.0   | 0.0   | 0.0   | 0.0    | 0.0   | 0.0   | 0.0   | 0.0   | 0.0   | 0.0   | 0.0   | 0.0   | 0.0   | 0.0    | 0.0   | 0.0    | 0.0   | 0.0    | 0.0    | 0.0    | 0.0   | 0.0    | 0.0    |       |
| C05562  | 4-Hydroxymethylimidazole           | 99.0553  | 10.9     | 0.0    | 0.0   | 0.0    | 0.0   | 0.0    | 0.0    | 0.0   | 0.0   | 0.0   | 0.0   | 0.0    | 0.0   | 0.0   | 0.0   | 0.0   | 0.0   | 0.0   | 0.0   | 0.0   | 0.0   | 0.0    | 0.0   | 0.0    | 0.0   | 0.0    | 0.0    | 0.0    | 0.0   | 0.0    | 0.0    |       |
| C11118  | 1-Methyl-2-pyrrolidone             | 100.0758 | 33.4     | 0.28   | 1.9   | 0.69   | 0.94  | 0.85   | 2.2    | 1.9   | 0.70  | 2.7   | 0.71  | 0.37   | 1.4   | 0.24  | 0.77  | 0.78  | 1.2   | 1.4   | 1.2   | 1.6   | 2.5   | 0.17   | 1.2   | 0.62   | 0.67  | 0.69   | 1.2    | 0.61   | 0.40  | 2.5    | 1.1    |       |
| C00571  | Cyclohexylamine                    | 100.1123 | 12.0     | 0.0    | 0.0   | 0.0    | 0.0   | 0.0    | 0.0    | 0.0   | 0.0   | 0.0   | 0.0   | 0.0    | 0.0   | 0.0   | 0.0   | 0.0   | 0.0   | 0.0   | 0.0   | 0.0   | 0.0   | 0.0    | 0.0   | 0.0    | 0.0   | 0.0    | 0.0    | 0.0    | 0.0   | 0.0    | 0.0    |       |
| C01234  | 1-Aminoocyclopropane-1-carboxylate | 102.0548 | 13.9     | 0.0    | 0.0   | 0.0    | 0.0   | 0.0    | 0.0    | 0.0   | 0.0   | 0.0   | 0.0   | 0.0    | 0.0   | 0.0   | 0.0   | 0.0   | 0.0   | 0.0   | 0.0   | 0.0   | 0.0   | 0.0    | 0.0   | 0.0    | 0.0   | 0.0    | 0.0    | 0.0    | 0.0   | 0.0    | 0.0    |       |
| C00576  | Biotin aldehyde                    | 102.0901 | 11.7     | 0.0    | 0.0   | 0.0    | 0.0   | 0.0    | 0.0    | 0.0   | 0.0   | 0.0   | 0.0   | 0.0    | 0.0   | 0.0   | 0.0   | 0.0   | 0.0   | 0.0   | 0.0   | 0.0   | 0.0   | 0.0    | 0.0   | 0.0    | 0.0   | 0.0    | 0.0    | 0.0    | 0.0   | 0.0    | 0.0    |       |
| C00750  | Spermine                           | 102.1162 | 6.9      | 0.0    | 0.0   | 0.0    | 0.0   | 0.0    | 0.0    | 0.0   | 0.0   | 0.0   | 0.0   | 0.0    | 0.0   | 0.0   | 0.0   | 0.0   | 0.0   | 0.0   | 0.0   | 0.0   | 0.0   | 0.0    | 0.0   | 0.0    | 0.0   | 0.0    | 0.0    | 0.0    | 0.0   | 0.0    | 0.0    |       |
| C08306  | Hexylamine                         | 102.1279 | 12.1     | 0.0    | 0.0   | 0.0    | 0.0   | 0.0    | 0.0    | 0.0   | 0.0   | 0.0   | 0.0   | 0.0    | 0.0   | 0.0   | 0.0   | 0.0   | 0.0   | 0.0   | 0.0   | 0.0   | 0.0   | 0.0    | 0.0   | 0.0    | 0.0   | 0.0    | 0.0    | 0.0    | 0.0   | 0.0    | 0.0    |       |
| C01672  | Cadaverine                         | 103.1229 | 7.8      | 0.19   | 0.86  | 0.15   | 0.19  | 0.029  | 0.63   | 0.19  | 0.025 | 0.35  | 0.19  | 0.24   | 1.0   | 0.14  | 0.28  | 0.073 | 0.48  | 0.18  | 0.049 | 0.27  | 0.29  | 0.12   | 0.78  | 0.27   | 0.26  | 0.028  | 0.58   | 0.13   | 0.025 | 0.44   | 0.18   |       |
| C00334  | GABA                               | 104.0705 | 12.0     | 0.031  | 0.029 | 0.028  | 0.027 | 0.012  | 0.049  | 0.033 | 0.016 | 0.057 | 0.025 | 0.046  | 0.046 | 0.044 | 0.044 | 0.019 | 0.057 | 0.036 | 0.024 | 0.072 | 0.030 | 0.028  | 0.031 | 0.065  | 0.047 | 0.011  | 0.055  | 0.023  | 0.014 | 0.095  | 0.027  |       |
| C01542  | 3-Hydroxyisobutyrate               | 104.0710 | 12.3     | 0.039  | 0.097 | 0.014  | 0.010 | 0.018  | 0.013  | 0.029 | 0.0   | 0.020 | 0.0   | 0.064  | 0.017 | 0.14  | 0.012 | 0.021 | 0.023 | 0.029 | 0.035 | 0.0   | 0.026 | 0.011  | 0.020 | 0.015  | 0.016 | 0.016  | 0.021  | 0.024  | 0.0   | 0.0    | 0.0    |       |
| C02356  | 2AB                                | 104.0708 | 15.1     | 0.011  | 0.052 | 0.023  | 0.037 | 0.0083 | 0.19   | 0.028 | 0.016 | 0.021 | 0.011 | 0.030  | 0.048 | 0.017 | 0.052 | 0.022 | 0.085 | 0.033 | 0.031 | 0.050 | 0.025 | 0.013  | 0.038 | 0.037  | 0.055 | 0.0082 | 0.071  | 0.017  | 0.015 | 0.054  | 0.016  |       |
| C02721  | N-Methylamine                      | 104.0705 | 16.1     | 0.0    | 0.0   | 0.0    | 0.0   | 0.0    | 0.0    | 0.0   | 0.0   | 0.0   | 0.0   | 0.0    | 0.0   | 0.0   | 0.0   | 0.0   | 0.0   | 0.0   | 0.0   | 0.0   | 0.0   | 0.0    | 0.0   | 0.0    | 0.0   | 0.0    | 0.0    | 0.0    | 0.0   | 0.0    | 0.0    |       |
| C01026  | N,N-Dimethylglycine                | 104.0710 | 17.1     | 0.0    | 0.0   | 0.0    | 0.0   | 0.0    | 0.0073 | 0.0   | 0.0   | 0.0   | 0.0   | 0.0    | 0.0   | 0.0   | 0.0   | 0.0   | 0.0   | 0.0   | 0.0   | 0.0   | 0.0   | 0.0    | 0.0   | 0.0    | 0.0   | 0.0    | 0.0    | 0.0    | 0.0   | 0.0    | 0.0    |       |
| C00114  | Choline                            | 104.1069 | 10.7     | 0.16   | 0.13  | 0.33   | 0.20  | 0.12   | 0.13   | 0.21  | 0.12  | 0.36  | 0.18  | 0.29   | 0.26  | 0.34  | 0.40  | 0.28  | 0.30  | 0.33  | 0.25  | 0.40  | 0.32  | 0.20   | 0.33  | 0.69   | 0.44  | 0.21   | 0.22   | 0.19   | 0.21  | 0.51   | 0.28   |       |
| C02392  | 3-Diaminopropanate                 | 106.0498 | 11.2     | 0.0    | 0.0   | 0.0    | 0.0   | 0.0    | 0.0    | 0.0   | 0.0   | 0.0   | 0.0   | 0.0    | 0.0   | 0.0   | 0.0   | 0.0   | 0.0   | 0.0   | 0.0   | 0.0   | 0.0   | 0.0    | 0.0   | 0.0    | 0.0   | 0.0    | 0.0    | 0.0    | 0.0   | 0.0    | 0.0    |       |
| C00065  | Ser                                | 106.0498 | 15.7     | 0.14   | 0.18  | 0.19   | 0.13  | 0.053  | 0.32   | 0.20  | 0.092 | 0.31  | 0.19  | 0.24   | 0.25  | 0.16  | 0.21  | 0.11  | 0.24  | 0.19  | 0.13  | 0.30  | 0.19  | 0.43   | 0.88  | 0.94   | 0.66  | 1.1    | 0.85   | 0.46   | 0.23  | 0.75   | 0.63   |       |
| C00672  | Diethanolamine                     | 106.0862 | 12.0     | 0.22   | 0.18  | 0.26   | 0.15  | 0.19   | 0.050  | 0.11  | 0.16  | 0.16  | 0.19  | 1.2    | 0.45  | 0.94  | 0.49  | 1.1   | 0.33  | 0.76  | 0.34  | 0.72  | 0.85  | 0.16   | 0.18  | 1.4    | 0.17  | 0.28   | 0.32   | 0.42   | 0.16  | 0.10   | 0.18   |       |
| C02299  | N-Methylamine                      | 108.0806 | 11.6     | 0.0    | 0.0   | 0.0    | 0.0   | 0.0    | 0.0    | 0.0   | 0.0   | 0.0   | 0.0   | 0.0    | 0.0   | 0.0   | 0.0   | 0.0   | 0.0   | 0.0   | 0.0   | 0.0   | 0.0   | 0.0    | 0.0   | 0.0    | 0.0   | 0.0    | 0.0    | 0.0    | 0.0   | 0.0    | 0.0    |       |
| C00519  | Hypotaurine                        | 110.0268 | 28.5     | 0.060  | 0.0   | 0.0    | 0.0   | 0.0    | 0.024  | 0.039 | 0.040 | 0.0   | 0.0   | 0.13   | 0.0   | 0.0   | 0.0   | 0.0   | 0.0   | 0.0   | 0.0   | 0.0   | 0.0   | 0.0    | 0.0   | 0.0    | 0.0   | 0.0    | 0.0    | 0.0    | 0.0   | 0.0    | 0.0    |       |
| C01987  | 5-Aminophenol                      | 110.0601 | 12.2     | 0.0    | 0.0   | 0.0    | 0.0   | 0.0    | 0.0    | 0.0   | 0.0   | 0.0   | 0.0   | 0.0    | 0.0   | 0.0   | 0.0   | 0.0   | 0.0   | 0.0   | 0.0   | 0.0   | 0.0   | 0.0    | 0.0   | 0.0    | 0.0   | 0.0    | 0.0    | 0.0    | 0.0   | 0.0    | 0.0    |       |
| C00380  | Cytosine                           | 112.0504 | 11.3     | 0.0    | 0.0   | 0.0    | 0.    |        |        |       |       |       |       |        |       |       |       |       |       |       |       |       |       |        |       |        |       |        |        |        |       |        |        |       |
