# Supplementary material for: Comparison of oral metabolome profiles of stimulated saliva, unstimulated saliva, and mouth-rinsed water
Source: Sci Rep. 2022 Jan 13;12:689. doi: 10.1038/s41598-021-04612-x (PMC8758762; doi:10.1038/s41598-021-04612-x)
Supplement: Supplementary file 2 — Supplementary Information 2. [file 41598_2021_4612_MOESM2_ESM.pdf]

[illegible]

[illegible]

Red font : conc>500uM  
S/N<10  
Orange font : Neutral compounds
